# Supplementary material
Source: publisher figshare collection journal article supplement (https://karger.figshare.com/ndownloader/files/22174779)
Supplement: Supplementary file 1 [file 22174779]

*

*

Supplementary Figure 1.
